# **Natural Secretory Immunoglobulins Enhance Norovirus Infection**

Holly Turula<sup>1,2</sup>, Juliana Bragazzi-Cunha<sup>1</sup>, Sadeesh Ramakrishnan<sup>3</sup>, Carol Wilke<sup>4</sup>,  
Mariam Gonzalez-Hernandez<sup>1</sup>, Alexandra Pry<sup>1</sup>, Julianne Fava<sup>1</sup>, Sophia Svoboda<sup>1</sup>,  
Yatrik Shah<sup>3</sup>, Blaise Corthesy<sup>5</sup>, Bethany Moore<sup>1,4</sup>, Christiane E. Wobus<sup>1\*</sup>

<sup>1</sup>Department of Microbiology and Immunology, University of Michigan, Ann Arbor, MI, USA

<sup>2</sup>Graduate Program in Immunology, University of Michigan, Ann Arbor, MI, USA

<sup>3</sup>Molecular and Integrative Physiology, University of Michigan, Ann Arbor, MI, USA

<sup>4</sup>Department of Internal Medicine, Division of Pulmonary and Critical Care Medicine, University of Michigan, Ann Arbor, MI, USA

<sup>5</sup>R & D Laboratory, Division of Immunology and Allergy, University State Hospital (CHUV), Lausanne, Switzerland

\*Corresponding author: [cwobus@umich.edu](mailto:cwobus@umich.edu)

1150 West Medical Center Dr.  
5622 Med Sci. II Bldg.  
Ann Arbor, MI  
48109  
USA

# **Abstract**

Secretory immunoglobulins (SIg) are a first line of mucosal defense by the host. They are secreted into the gut lumen via the polymeric immunoglobulin receptor (pIgR) where they bind to antigen and are transported back across the FAE via M cells. Noroviruses are highly prevalent, enteric pathogens that cause significant morbidity, mortality and economic losses worldwide. Murine norovirus (MNV) exploits microfold (M) cells to cross the lymphoid follicle-associated epithelium (FAE) and infect the underlying population of immune cells. However, whether natural, innate SIg can protect against norovirus infection remains unknown. To investigate the role of natural SIg during murine norovirus pathogenesis, we used pIgR-deficient animals, which lack SIg in the intestinal lumen. Contrary to other enteric pathogens, acute MNV replication was significantly reduced in the gastrointestinal tract of pIgR-deficient animals compared to controls, despite increased numbers of dendritic cells, macrophages, and B cells in the Peyer's patch, established MNV target cell types. Also, natural SIg did not alter MNV FAE binding or FAE crossing into the lymphoid follicle. Instead, further analysis revealed enhanced baseline levels of the antiviral molecules interferon gamma (IFN $\gamma$ ) and inducible nitric oxide synthase (iNOS) in the small intestine of naive pIgR-deficient animals compared to controls. Removing the microbiota equalized IFN $\gamma$  and iNOS transcript levels as well as MNV viral loads in germ-free pIgR KO mice compared to germ-free controls. These data are consistent with a model whereby SIg sensing reduces pro-inflammatory, antiviral molecules, which facilitates intestinal homeostasis but thereby promotes MNV infection. In conclusion, these findings demonstrate that natural SIg are not protective during norovirus infection in mice and represent another example of indirect modulation of enteric virus pathogenesis by the microbiota.

## Introduction

The extensive mucosal surface of the gastrointestinal tract is a potential entry point for many pathogens. To protect itself from pathogen attack, the host has evolved multiple mechanisms, including the secretion of immunoglobulins (i.e., secretory Ig (SIg). SIg neutralize microbes in the intestinal lumen and groom enteric bacteria by mediating removal of pathogenic species and reducing the immunogenicity of remaining populations (Kaetzel 2014). Intestinal epithelial cells transcytose polymeric IgA (pIgA) and pIgM from the lamina propria via the basolaterally expressed polymeric immunoglobulin receptor (pIgR). Once the pIgR:pIgA/M complex reaches the intestinal lumen, the receptor is cleaved, and SIgA and SIgM are formed (Kaetzel 2014). This transcytotic process is used as a host defense to expel pathogens that have crossed the epithelial barrier and for pathogens present in intestinal epithelial cells (Corthesy 2009). Specifically, pIgR is necessary for the defense against such divergent enteric pathogens as Salmonella (Wijburg, Uren et al. 2006), Giardia muris (Davids, Palm et al. 2006), and rotavirus (Schwartz-Cornil, Benureau et al. 2002) and deletion of pIgR results in increased pathogen loads.

SIgA represent the predominant species of immunoglobulins in the intestine (Pabst, Cerovic et al. 2016) and as such are a critical first line of defense at mucosal surfaces (Corthesy 2007). However, in addition to their host defense function they also play an immunomodulatory role (Corthesy 2007). The follicle-associated epithelium (FAE) of Peyer's patches (PP) and other mucosal-associated lymphoid follicles contain microfold (M) cells. M cells specialize in the uptake of luminal micro- and macromolecules across the FAE into PP to be sampled by the underlying antigen-presenting cells (APCs) (Corthesy 2007). SIgA aid in this luminal sampling and the initiation of mucosal immune responses. Selective adherence of luminal SIgA to the M cell surface triggers uptake of SIgA-immune complexes into the PP (Mantis, Cheung et al. 2002), resulting in 'retrograde' SIgA sampling by dendritic cells (DCs) (Rey, Garin et al. 2004). This uptake initiates non-inflammatory activation of DCs and induction of regulatory T cells (Corthesy 2007). The SIgA-induced anti-pathogenic immune responses also non-specifically reduce the inflammatory potential of macrophages via upregulation of inhibitory receptors (Mantis, Rol et al. 2011).

Noroviruses are the leading cause of acute gastroenteritis worldwide with an annual estimated global cost of \$60 billion (Bartsch, Lopman et al. 2016). Every year, these viruses are responsible for the death of ~200,000 children under the age of 5 in developing countries and an estimated 21 million infections in the USA alone (Patel, Widdowson et al. 2008, Hall, Lopman et al. 2013). Yet, no approved virus-specific prevention and treatment strategies exist for this emerging pathogen. Noroviruses replicate in the gastrointestinal tract and infect multiple different cell types of both intestinal epithelial and immune cell origin *in vitro* and *in vivo* (Karst and Wobus 2015, Karandikar, Crawford et al. 2016, Grau, Roth et al. 2017). Thus, these viruses must navigate the complex mixture of microbial and host-derived substances in the intestinal lumen to cross the intestinal epithelial barrier and establish an infection. Targeting these very early events during infection may provide an avenue for intervention, as they are instrumental in determining host range, initiation of immune responses, and

pathogenesis. However, very limited information is available about factors that promote or inhibit the early steps during norovirus pathogenesis.

To gain a better understanding of the early events in norovirus infection, we and others use murine norovirus (MNV), an established and highly tractable animal model for studying norovirus biology (Karst and Wobus 2015). MNV is a natural mouse pathogen endemic to animal facilities across the world (Hsu, Wobus et al. 2005, Muller, Klemm et al. 2007, Kitajima, Oka et al. 2009, Kim, Lee et al. 2010). The first MNV strain, MNV-1, was discovered in 2003, but multiple MNV strains have been isolated since (Karst, Wobus et al. 2003, Thackray, Wobus et al. 2007). MNV-1 causes an acute infection and initiates infection in the ileum (Gonzalez-Hernandez, Liu et al. 2014), the distal most portion of the small intestine, which also has the greatest density of PP (Mowat and Agace 2014). It is in intestinal lymphoid follicles, such as PP, that MNV infection is primarily detected in antigen-presenting cells (APCs) (DCs, macrophages) and lymphocytes (T cells, B cells) (Wobus, Karst et al. 2004, Jones, Watanabe et al. 2014, Grau, Roth et al. 2017). To reach these target cells underneath the intestinal epithelium, MNV hijacks M cells and uses these cells as an entry portal for targeted delivery of virions to permissive cells (Gonzalez-Hernandez, Liu et al. 2013, Gonzalez-Hernandez, Liu et al. 2014, Karst and Wobus 2015). In addition to M cells, enteric bacteria are also required for optimal MNV pathogenesis (Jones, Grau et al. 2015, Baldridge, Turula et al. 2016). Despite the multi-faceted role of SIg in grooming luminal bacteria, defense from pathogens, and sampling of these complexes by M cells, nothing is known about the role of natural SIg during norovirus infection.

Thus, the goal of this study was to investigate the role of natural SIg in MNV-1 infection. Towards that end, we used plgR-deficient animals (plgR KO), which lack SIg in the intestinal lumen. Surprisingly, and contrary to the known protective role of natural SIg (Wijburg, Uren et al. 2006), MNV-1 viral loads were reduced in the gastrointestinal tract of plgR KO animals compared to C57BL/6 controls (WT B6). This was despite enhanced numbers of DCs, macrophages, and B cells in the PP of plgR KO mice. Inhibition of virus infection may have been in part due to enhanced baseline levels of interferon gamma (IFN- $\gamma$ ), a cytokine known to inhibit MNV translation (Changotra, Jia et al. 2009), and the antiviral molecule inducible nitric oxide synthase (iNOS), in naive plgR-deficient animals compared to WT animals. Removing the microbiota adjusted IFN- $\gamma$  and iNOS levels in germ-free plgR KO to similar levels as in germ-free WT B6 animals and restored viral loads to WT levels in plgR KO mice. Taken together, these data demonstrate that natural SIg do not play a protective but a proviral role during norovirus infection. These findings further suggest a model whereby SIg sensing reduces levels of some antiviral molecules and contributes to intestinal homeostasis, which in turn promotes MNV infection.

## **Materials and Methods**

**Animals.** C57BL/6 animals were purchased from Jackson Laboratories (Bar Harbor, ME). A breeder pair of PlgR knockout mice on a C57BL/6 background (B6.129P2-*PigR*<sup>tm1Fejo</sup>/Mmmh, stock number: 030988-MU) was obtained from Drs. Stappenbeck and Virgin (Washington University, St. Louis, MO). All animals were bred and housed in a SPF-free and MNV-free room. Serum tested negative for MNV using our ELISA

(Wobus, Karst et al. 2004). All animals were used between 6 and 12 weeks of age. Animal studies were done in accordance with local and federal guidelines. The protocol was approved by the University of Michigan Committee on Use and Care of Animals (UCUCA number PRO00006658).

**MNV Virus Stocks.** The plaque-purified MNV-1.CW3 (GV/MNV1/2002/USA) virus stock (herein referred to as MNV-1) was generated as previously described (Taube, Perry et al. 2012). A neutral red-labeled MNV-1 stock (MNV-1-NR) ( $3.8 \times 10^6$  PFU/mL) was generated from MNV-1, passage 6, as previously described (Gonzalez-Hernandez, Perry et al. 2013). MNV-1-NR was handled in a darkened room using a red photolight (Premier OMNI, #SL-23R). 1 ml aliquots were stored in a light safe box at  $-80^\circ\text{C}$ .

**Animal Infection.** Animals were infected in a darkened room using a red photolight via oral gavage (o.g.) with  $3.8 \times 10^5$  plaque-forming units (PFU) of MNV-1-NR in 100  $\mu\text{L}$ /mouse. Tissues were harvested at 9 or 18 hours post infection (hpi) as previously described (Gonzalez-Hernandez, Liu et al. 2014) with the following modifications: 2 cm of tissue was collected in pre-weighed 2 ml O-ring tubes (Denville Scientific #C19042-S) containing 1.0 mm diameter zirconia/silica beads (BioSpec #11079110z), flash frozen in an ethanol/ dry ice bath, weighed, and stored at  $-80^\circ\text{C}$ .

**Plaque Assay.** Homogenized samples were exposed to white light for 30 min to inactivate input virus. Light exposure reduced MNV-1-NR titers by 3 logs. The plaque assay was performed as previously described (Gonzalez-Hernandez, Bragazzi Cunha et al. 2012). Samples without detectable replicated virus were assigned 10 PFU/mL as the lowest detectable unit. Data was normalized to PFU per gram of tissue. The limit of detection (LOD) was determined for each organ by averaging the PFU/gram tissue of all samples without detectable viral titers.

**RNA Isolation.** Total RNA was extracted from tissue samples via TRIzol Reagent (ThermoFisher Scientific) following manufacturers guidelines and resuspended in 30  $\mu\text{L}$  RNase, DNase free water (Corning). Contaminating DNA was removed by treating samples with Turbo DNA free DNase kit (ThermoFisher Scientific). One  $\mu\text{L}$  TURBO DNase was added for 30 min at  $37^\circ\text{C}$ , before adding another 1  $\mu\text{L}$  and incubating for an additional 30 min at  $37^\circ\text{C}$ . DNase activity was stopped by adding 0.2 volumes of DNase Inactivation Reagent for 5 minutes at room temperature. Total RNA was quantified using a spectrophotometer (NanoDrop #ND-1000) and stored at  $-80^\circ\text{C}$  for further use.

**Quantitative Real-Time PCR.** To measure host cell transcripts, cDNA was generated with 100  $\mu\text{g}$  of total RNA using iScript Reverse Transcription Supermix for RT-qPCR (Bio-Rad) using the following protocol:  $25^\circ\text{C}$  at 5 min,  $42^\circ\text{C}$  at 30 min,  $85^\circ\text{C}$  at 5 min in a thermocycler (Eppendorf Mastercycler Eppgradient PCR machine) and stored at  $-20^\circ\text{C}$ . One  $\mu\text{L}$  of total cDNA was analyzed for levels of Gapdh (Wood, Rios et al. 2016), GP2 (Wood, Rios et al. 2016), Spi-B (Wood, Rios et al. 2016), IFN- $\gamma$  (Mohanty, Shivakumar et al. 2006), interferon-beta (IFN- $\beta$ ) (Mohanty, Shivakumar et al. 2006), tumor necrosis factor-alpha (TNF- $\alpha$ ) (Mohanty, Shivakumar et al. 2006), iNOS (Stoolman, Vannella et al. 2011), Interferon stimulated gene 15 (ISG15) (Lopusna, Benkoczka et al. 2016),



transforming growth factor-beta (TGF- $\beta$ ) (Henderson, Mackinnon et al. 2006), interleukin-10 (IL-10) (Terashima, Watarai et al. 2008), interferon-lambda (IFN- $\lambda$ ) (Lopusna, Benkoczka et al. 2016) in a Biorad CFX96 Real Time System qPCR machine using Sso Advanced Universal SYBR Green Supermix (Bio-Rad). Gene expression was normalized to transcript levels of the endogenous host gene *Gapdh*, and fold change was calculated relative to WT C57BL/6 controls using the delta delta CT method as described (Higgins, Johnson et al. 2011). Quantification of MNV-1 genome equivalents in host tissue was performed as previously described (Taube, Perry et al. 2012).

**Ligated Intestinal Loops.** Animals were anesthetized using 5% isoflourane and placed on a 37°C heating pad to maintain body temperature throughout the procedure to maintain body temperature throughout the procedure. The ileum was tied gently on either side of each PP using silk surgical suture thread (LOOK #SP118). Approximately 0.1 ml MNV-1 ( $6.7 \times 10^7$  PFU/mL) was injected as the loose end of the loop was tightened, resulting in a 2 cm closed loop. The anesthetized mouse was monitored for 25 min, after which the PP were excised. Mucus was removed using 5 mM Dithiothreitol (Sigma-Aldrich) in 1x phosphate buffered saline (PBS) (Gibco) for 10 min in a 37°C water bath. The FAE was removed by shaking the PP at 250 rpm (MaxQ 600, Thermo Scientific) for 20 min in 1x PBS containing 5 mM EDTA (Fluka Analytical). PP were removed and free cells were collected. PP lamina propria and FAE were then washed twice with 1x PBS by gently inverting the tubes. Cells were placed in 500  $\mu$ l RNALater (Sigma) and then stored at -80°C. For SIgA:MNV complex formation, MNV-1 ( $2.8 \times 10^7$  PFU) was pre-incubated with 0.25 mg/ml recombinant SIgA (Crottet, Peitsch et al. 1999) (a generous gift from Dr. Blaise Corthésy, University of Lausanne) or 0.25 mg/ml bovine serum albumin fraction V (Roche #03116956001) diluted in 1x PBS for 1 hour at 37°C before adding to the loop and treated as described above.

**Tissue Digestion/ Flow Cytometry.** PP and small intestine lamina propria were dissected from naive PlgR KO and WT B6 animals and digested as previously described (Geem, Medina-Contreras et al. 2012). Viable cells were enumerated using a hemocytometer and 0.4% trypan blue (Gibco).  $2 \times 10^6$  cells were then used for flow cytometric analysis. Cells were stained for cell viability (Invitrogen Live/Dead fixable Aqua Dead Cell stain Kit #L34957) for 15 min on ice in 1x PBS. Cells were then washed and stained for expression of the following surface markers: CD45 (diluted 1:200, clone 30-F11, AF700, Biolegend #103128), I-A/I-E (diluted 1:50, clone M5/114.15.2, PE/Dazzle 594, Biolegend #107647), CD19 (diluted 1:50, clone 6D5, PerCP/Cy5.5, Biolegend #115534), CD11b (diluted 1:50, clone M1/70 APC/Cy7, Biolegend #101226), CD64 (diluted 1:50, clone X54-5/7.1 FITC, Biolegend #139316) CD11c (diluted 1:50, clone N418 PE/Cy7, Biolegend #117318). All were diluted in FACS buffer; 5% fetal bovine serum (Hyclone #SH30396.03) and 0.1% sodium azide (Sigma) in 1x PBS, for 30 min on ice. After surface staining, cells were fixed for 10 min on ice using Cytofix/Cytoperm (BD Biosciences). After fixation, cells were washed and fluorescence was analyzed with a BD LSRfortessa (BD Biosciences). Data was analyzed using FlowJo software (BD Biosciences). The gating strategy was as follows. Live, CD45 and I-A/I-E (MHCII) positive APCs were identified and further characterized into B cells (CD19+), and mononuclear phagocytes (CD19-/CD11b+) were further delineated into

macrophages via CD64 expression (CD64+/CD11c-), and DCs using CD11c (CD64-/CD11c+).

**Purification of MNV-1 capsid protein protruding (P) and shell (S) domains.** P and S domain were bacterially expressed and recombinant proteins purified as previously described (Taube, Rubin et al. 2010).

**ELISAs.** The SIgA ELISA was performed as described previously (Karst, Wobus et al. 2003) with the following modifications. Microtiter plates (Immulon II HB flat-bottomed ELISA plate, Thermo Labsystems) were coated with 0.1 mg/ml mouse SIgA, IgA dimer, or secretory component (kindly provided by Dr. B. Corthesy, Lausanne University) in coating buffer overnight at 4°C. Plates were washed and blocked overnight at 4°C. Recombinant P and S domain were then added (0.1 mg/ml) for 1 hour at 37°C. Bound MNV-1 capsid domains were detected with a rabbit polyclonal anti-MNV-1 VLP (diluted 1:5000) (Wobus, Karst et al. 2004) followed by a peroxidase-conjugated goat anti-rabbit secondary antibody (IgG diluted 1:1000, Jackson Laboratories) and absorbance was read at 405 nm. Mouse IgA was analyzed in feces and serum using the mouse-specific IgA kit following manufacturer's protocol (Bethyl Laboratories, Montgomery, TX). For fecal IgA ELISA, 10% fecal slurry was made using the provided sample dilution buffer. The fecal slurry was further diluted 1:200 using sample dilution buffer and the IgA was assessed in 100 µl of the diluted slurry. For serum IgA analysis, 100 µl of 1:500 diluted serum samples (in sample dilution buffer) was used.

**Statistical Analysis.** All data were analyzed using unpaired Student's T test using the data analysis program, GraphPad Prism version 7 (GraphPad Software, La Jolla, CA). \* = P<0.05. \*\* = P<0.01 \*\*\* = P<0.001. \*\*\*\* = P<0.0001

## **Results**

### **Acute norovirus infection is reduced in plgR KO mice.**

To investigate the role of SIg during norovirus infection, we analyzed MNV-1 infection in mice lacking plgR (Uren, Johansen et al. 2003), the receptor necessary for SIg transcytosis into the lumen. Since assessment of viral replication in the intestine is confounded by the lingering presence of the initial inoculum, neutral red, a light-sensitive dye, was incorporated into MNV-1 virions (MNV-1-NR) as previously described (Gonzalez-Hernandez, Perry et al. 2013). Exposure to light inactivates MNV-1-NR virions but not newly replicated MNV-1 particles devoid of NR, providing a means to differentiate between input (i.e., light-sensitive) and replicated (i.e., light-tolerant) virus (Gonzalez-Hernandez, Perry et al. 2013).

To determine the kinetics of acute MNV-1-NR infection, we first performed a time-course of MNV-1-NR infection in C57BL/6 mice. Mice were infected by oral gavage with  $3.8 \times 10^5$  PFU, and viral loads measured after 9, 12, 18, and 24 hpi. No replication was detected in the stomach and duodenum throughout the 24 hour time course (**Figures S1B-C**). Replicated viral titers were first detected at 9 hpi in the jejunum and ileum of C57BL/6 animals (**Figures S1D-E**). Ileal replicated viral titers peaked at 12 hpi and then plateaued, whereas jejunal replicated viral titers did not significantly increase

until 24 hpi. A small amount of replicated virus was also detected at 9 hpi in the mesenteric lymph node (MLN) and increased steadily throughout the time course (**Figure S1A**). Replicated viral titers in the cecum and ascending colon were first detected 12 hpi and increased until 24 hpi (**Figure S1F-G**). Shedding of replicated virus was only observed in one animal at 18 hpi (**Figure S1H**). Taken together, these results suggest that the first round of MNV-1 replication occurs within 9 hpi in the distal small intestine after oral infection of C57BL/6 animals.

Next, we compared MNV-1 infection in naïve plgR-deficient (plgR KO) and C57BL/6 wild type (WT B6) mice. We first confirmed that fecal levels of IgA are undetectable in plgR KO mice, while serum IgA levels are significantly increased compared to WT B6 animals (**Figure S2A-B**) in accordance with the literature (Johansen, Pekna et al. 1999, Shimada, Kawaguchi-Miyashita et al. 1999). Then, we measured viral loads in the intestinal tract and draining lymph nodes of plgR-deficient (plgR KO) and C57BL/6 wild type (WT B6) mice at 9 and 18 hpi, or after approximately one and two replicative cycles, respectively. Replicated viral titers were detectable at 9 hpi in the jejunum and ileum of plgR KO and WT B6 animals (**Figure S3C-D**). Surprisingly, viral loads in the ileum of plgR KO animals were significantly reduced compared to WT B6 controls (**Figure S3D**). No consistent infection was detected in the remaining organs in either group (**Figures S3A-B, S3E-G**). After a second round of MNV-1 replication at 18 hpi, however, replication was detected in most organs and the difference between plgR KO and WT mice had magnified (**Figure 1**). Specifically, plgR KO animals had significantly reduced levels of replicated viral titers in the MLN, jejunum, ileum, and colon compared to controls (**Figure 1A, 1C-D, 1F**). Replication was only detectable in a few animals in the duodenum in both groups (**Figure 1B**), while fecal shedding was only detectable in WT B6 mice (**Figure 1G**). The lack of fecal shedding in plgR KO mice may be a reflection of the overall reduced virus load in these animals. Taken together, these data demonstrate that plgR KO mice have reduced viral loads overall, suggesting that natural, non-MNV specific, SIg are not protective, but instead enhance acute norovirus infection *in vivo*.

### **Natural Secretory Immunoglobulins do not aid in MNV-1 access to Peyer's patches.**

To determine the mechanism of reduced MNV-1-NR infection of plgR KO animals, we further characterized these mice. First, we investigated M cell-associated gene expression since M cells are necessary for efficient MNV infection (Gonzalez-Hernandez, Liu et al. 2013, Gonzalez-Hernandez, Liu et al. 2014). Host RNA was isolated from PP in the ileum of naïve plgR KO and WT B6 mice and analyzed for transcript levels of SpiB and GP2, a transcription factor required during M cell development and a marker of mature M cells, respectively (Mabbott, Donaldson et al. 2013). No differences in expression levels were observed for both genes between both groups (**Figure 2A**). These data suggest that the virus encounters similar levels of M cells during infection of both mouse strains, and that the lack of plgR and associated lack of SIg:antigen complex sensing does not significantly affect M cell development.

SIg are taken up by M cells and sampled by the underlying network of MNV-susceptible APCs (Corthesy 2007). To determine whether natural SIg aid in viral targeting to, and transcytosis across the epithelial barrier, we first determined whether



MNV-1 is capable of interacting with non-NoV specific, recombinant sIgA. Recombinant anti-rotavirus SIgA, secretory component alone or dimeric IgA (Crottet, Cottet et al. 1999) were coated in ELISA plates and incubated with bacterially expressed MNV-1 P and S domains followed by detection with a polyclonal anti-MNV antibody (**Figure S4A**). The P domain of the MNV-1 capsid protein bound to sIgA as a whole and both components, the IgA dimer and secretory component. Binding of the S domain to SIgA or its components was similar to the negative control BSA. These data demonstrate the interaction with natural SIgA is restricted to the P domain, which also interacts with host cell receptors and contains neutralizing antibody epitopes (Kolawole, Smith et al. 2017). SIgA did not affect viral infection *in vitro* since no difference was observed in infectious MNV-1 titers by plaque assay in murine macrophages (RAW 264.7 cells) when complexed with recombinant, non-antigen specific SIgA compared to MNV-1 alone (data not shown).

Since MNV-1 could bind to recombinant SIgA, we next performed ligated ileal loop assays to determine whether MNV-1 uptake was altered by the presence or absence of SIg. Ileal PP of naïve plgR KO and WT B6 animals were ligated to create a ~1 cm closed loop, and virus was injected as the loop was sealed. After 25 minutes, whole PP were excised and mucus-bound virions were removed via dithiothreitol (DTT) treatment prior to measuring viral genome titers by qRT-PCR. No difference was observed in viral genome copies (**Figure S4B**), suggesting similar amounts of virions bound and/or entered the PP in either mouse strain. However, MNV-1 infects primarily immune cells (Grau, Roth et al. 2017), so to investigate the amount of virions that reach the immune cells of the PP, we digested the FAE from the PP lamina propria with EDTA subsequent to DTT treatment and determined viral genome levels by qRT-PCR. Again, no differences were observed in the amount of viral genome associated with the PP FAE and those that crossed the FAE and associated with the lamina propria in plgR KO versus WT B6 animals (**Figure 2B**). However, one limitation of the previous experimental design is the significantly reduced interaction time of MNV-1 with SIg compared to a natural, oral infection during which the virus travels through the intestinal tract. We hypothesized that pre-incubation of MNV-1 with natural SIgA may boost virus internalization if performed prior to the ileal loop experiments. However, we detected similar MNV genome equivalents in the PP lamina propria in WT B6 and plgR KO animals when MNV-1 was pre-complexed with non-MNV specific SIgA or bovine serum albumin (BSA) as negative control (**Figure 2C**).

Taken together, these data demonstrate that although MNV-1 can interact with recombinant non-specific SIg, natural SIg does not facilitate MNV-1 binding to or crossing of the epithelial barrier. These findings indicate that natural SIg does not modulate norovirus interaction with the epithelial barrier.

### **plgR KO mice have increased numbers of small intestinal APC subsets.**

Since access to the site of viral replication, *i.e.*, PP, cannot account for the reduced infection seen in plgR KO animals, we next investigated whether a reduced number or percent of B cells, macrophages and DCs, the known MNV target cell types at the time (Wobus, Karst et al. 2004, Jones, Watanabe et al. 2014), in the small intestine might provide an explanation. Towards that end, small intestines and their PP were collected from naïve animals. Tissues were digested to create single cell

suspensions and cellularity was analyzed via flow cytometry. No difference was detected in the percentage of B cells (CD19+/CD11b-), macrophages (CD19-/CD11b+/CD64+), and DCs (CD19-/CD11b+/CD64-/CD11c+) in the villous or PP lamina propria (**Figure 3A-B**). No difference was observed in the number of the three APC subsets in the villous lamina propria (**Figure 3C**). Interestingly, all three APC subsets were increased roughly 2.5-fold in the PP lamina propria of plgR KO animals compared to controls (**Figure 3D**). These data demonstrate that plgR KO animals have increased numbers of MNV-susceptible cell types at the site of infection. Taken together with data from Figure 2, these data suggest that access to and availability of norovirus target cells cannot account for reduced MNV-1-NR infection seen in plgR KO animals.

### **IFN- $\gamma$ and iNOS levels are enhanced in naïve plgR KO mice.**

Slg complexes have immunomodulatory functions, and when enteric bacteria are recognized in complex with Slg an anti-inflammatory response is initiated (Corthesy 2007). Therefore, we next investigated whether plgR KO mice exhibit an altered intestinal immune landscape in the absence of Slg. Towards that end, transcript levels of a panel of cytokines and chemokines were analyzed in naïve plgR KO and compared to those from WT B6 animals. The ileum was chosen for assessment, as it is the initial site of MNV-1 replication, and the organ in which MNV-1 titers were significantly reduced at both 9 and 18 hpi in plgR KO animals (**see Figures 1, S1**). Host RNA was isolated from the naïve ileum of both groups of mice and analyzed by RT-qPCR for transcript levels of the anti-inflammatory genes TGF- $\beta$  and IL10, the pro-inflammatory and antiviral genes TNF- $\alpha$ , iNOS, IFN- $\gamma$ , IFN- $\beta$ , IFN- $\lambda$ , and ISG15. Both IFN- $\gamma$  and iNOS transcript levels were significantly enhanced in plgR KO animals compared to WT B6 controls (**Figure 4A-B**), while transcript levels of inflammatory molecules IFN- $\beta$ , TNF- $\alpha$  and ISG15 were similar (**Figure 4C-E**). Transcript levels of TGF- $\beta$ , a cytokine which promotes IgA class switching (Cerutti 2008), were also similar between strains (**Figure 4F**). IFN- $\lambda$  and IL10 were undetectable in either group (data not shown).

These data demonstrate that plgR KO animals have enhanced levels of iNOS and IFN- $\gamma$ , two well-known molecules with anti-viral activities (Karupiah, Xie et al. 1993, Persichini, Colasanti et al. 1999, Saura, Zaragoza et al. 1999, Samuel 2001). No significant mortality is seen in iNOS-deficient mice infected with MNV-1 (Karst, Wobus et al. 2003), and MNV-1 replicates similarly in bone marrow-derived macrophages from WT and iNOS-deficient mice (Wobus, Karst et al. 2004). On the other hand, IFN- $\gamma$  is a cytokine known to inhibit MNV-1 translation (Changotra, Jia et al. 2009, Maloney, Thackray et al. 2012). Thus, these findings suggest that elevated levels of some antiviral cytokines, in particular IFN- $\gamma$ , may limit MNV-1 replication in plgR KO mice.

### **IFN- $\gamma$ and iNOS levels are similar in germ-free plgR KO and WT B6 mice.**

To test whether enhanced levels of some antiviral molecules limit MNV infection in plgR KO mice, we first sought to identify a condition, in which the levels of IFN- $\gamma$  and iNOS are similar between plgR KO and WT mice. Since SlgA dampens the inflammatory signals of commensal bacteria (Corthesy 2007), we hypothesized that germ-free animals might represent one such condition. Thus, both mouse strains were rederived germ-free and transcript levels from the ileum of these mice infected with

MNV-1 for 18 hpi were analyzed. As hypothesized, ileal IFN- $\gamma$  and iNOS transcript levels were no longer statistically different without bacterial stimulation (**Figure 5A-B**). Similar to conventionally housed animals, IFN- $\beta$  and TNF- $\alpha$  transcript levels were equivalent between germ-free mice (**Figure 5C-D**). These data demonstrate that removal of the microbiota equalizes small intestinal IFN- $\gamma$  and iNOS levels in plgR KO and WT B6 mice, highlighting the immunomodulatory functions of SIg.

### **MNV-1 infection is similar in germ-free plgR KO and WT B6 mice.**

The previous findings suggest that, in the absence of plgR and hence SIg, inflammatory responses to enteric bacteria may create an inhospitable environment for MNV-1 replication. To test this hypothesis, we infected germ-free plgR KO and WT animals with MNV-1-NR and assessed replicated viral titers via plaque assay at 18 hpi. Consistent with our hypothesis, no differences were observed in replicated viral titers throughout the entire gastrointestinal tract (i.e., duodenum, jejunum, ileum, cecum, colon) and draining mesenteric lymph nodes in germ-free plgR KO animals compared to germ-free WT B6 controls (**Figure 6**). These data demonstrate that MNV-1 replicates similarly in plgR KO and WT mice under conditions where inflammatory markers such as IFN- $\gamma$  and iNOS are equivalent. These data suggest that plgR and SIg do not directly inhibit MNV infection but that SIg promote norovirus infection through the maintenance of intestinal homeostasis.

## **Discussion**

SIg provides a first line of defense against several enteric pathogens by reducing immunogenicity of luminal bacterial communities and mediating immune exclusion (reviewed in (Corthesy 2007)). PlgR and SIg are capable of neutralizing intraepithelial pathogens and mediate expulsion from the host (reviewed in (Kaetzel 2005, Corthesy, Benureau et al. 2006)). SIg can also bind and neutralize pathogens that have crossed the epithelial barrier and excrete them back into lumen (Corthesy 2007). Surprisingly, despite the ability to bind recombinant, non-MNV specific dIgA, SC and SIgA, removing SIg-mediated innate intestinal defenses in mice did not alter MNV-1 binding to the FAE or internalization into PP. Instead, our study demonstrated that plgR KO mice, which lack SIg, showed reduced MNV-1 infection. This suggests natural SIg does not exclude MNV from the intestine or mediate intraepithelial expulsion of this virus. More importantly, these data indicate that natural SIg do not protect from norovirus infection. This result is surprising considering that other enteric pathogens are controlled in this manner (Davids, Palm et al. 2006, Schwartz-Cornil, Benureau et al. 2002, Wijburg, Uren et al. 2006). To the best of our knowledge, this represents the first reported example in which plgR and SIg have proviral functions and promote infection by an enteric pathogen.

Further characterization of plgR KO mice indicated that reduced infection in plgR KO mice was not due to a lack of target cells. Instead, these mice had ~2.5 fold greater numbers of macrophages, DCs and B cells in their PP, indicating plgR KO mice have enlarged PP. In addition, the lack of norovirus infection was also not due to a lack of M cells, suggesting that M cell development is independent of SIg. However, analysis of host mRNA levels in the small intestine revealed that IFN- $\gamma$ , a cytokine that inhibits MNV

translation (Changotra, Jia et al. 2009) and iNOS, were elevated in naïve plgR KO animals compared to WT controls. Enhanced IFN- $\gamma$  and iNOS transcript levels in plgR KO mice were dependent on the presence of the microbiota. Germ-free plgR KO and WT B6 mice had equivalent cytokine and viral loads. Therefore, these data suggest that the lack of natural SIg indirectly inhibited MNV-1 infection.

Our data further indicate that the immune response generated towards the enteric microbiota promotes norovirus infection. This is consistent with previous work, which demonstrates that norovirus infections are modulated directly and indirectly by the presence of commensal bacteria (Karst 2016). In case of MNV, infection of antibiotic-treated mice results in decreased MNV loads in the ileum (Jones, Watanabe et al. 2014, Kernbauer, Ding et al. 2014), and commensal bacteria promote MNV persistence in the intestine via modulation of type III interferon responses (Baldrige, Nice et al. 2015). The study described herein represents another example by which enteric bacteria indirectly influence MNV pathogenesis. Specifically, MNV infection was reduced only in conventional plgR KO mice, which exhibited elevated levels of iNOS and IFN- $\gamma$ , but not in their germ-free counterpart, when cytokine levels were similar to WT mice. Previous studies have also reported enhanced inflammatory activation in plgR KO mice, resulting in lethal systemic hyperactivity (Karlsson, Johansen et al. 2010), spontaneous COPD (Richmond, Brucker et al. 2016), and enhanced susceptibility to chemically-induced colitis (Murthy, Dubose et al. 2006). A recent study provides a possible explanation based on elevated serum IgA levels in plgR KO mice (Johansen, Pekna et al. 1999, Shimada, Kawaguchi-Miyashita et al. 1999). Specifically, the study determined that innate immune cell detection of serum IgA via the IgA receptor (Fc $\alpha$ R1) in conjunction with pattern recognition receptor activation, resulted in a synergistic enhancement of pro-inflammatory cytokine production and release (Hansen, Hoepel et al. 2017). Another study demonstrated greater levels of enteric bacteria in the MLN of plgR KO mice and highly specific serum IgA responses to several enteric bacterial communities (Sait, Galic et al. 2007). Therefore, enhanced serum IgA levels, coupled with enhanced access of immune cells to bacteria may result in this improperly controlled immune response to enteric commensals, which we and others have observed in plgR KO mice.

Interestingly, the observed increase in inflammatory immune responses was not uniform, *i.e.*, elevated iNOS and IFN- $\gamma$  levels in conventional plgR KO mice, but no change in transcript levels of other pro-and anti-inflammatory mediators (see Fig. 4). The reason for this remains unclear. One potential explanation may come from the observed increases in the number of APC subsets (DCs, macrophages and B cells) in the PP of plgR KO animals compared to WT controls. These cell types have both Fc $\alpha$ R1 and pathogen recognition receptors and are capable of pro-inflammatory cytokine secretion (Sakamoto, Shibuya et al. 2001, Otten, Groenveld et al. 2006, Hansen, Hoepel et al. 2017). In particular macrophages are known to secrete iNOS and IFN- $\gamma$  (Munder, Mallo et al. 1998, Cherdantseva, Potapova et al. 2014). Previous studies have also found that intra-epithelial lymphocytes (IELs) are enhanced in the small intestines of plgR KO mice (Yamazaki, Shimada et al. 2005, Kato-Nagaoka, Shimada et al. 2015). Activated IELs from plgR KO animals exhibited more abundant IFN- $\gamma$  secretion than WT IELs (Kato-Nagaoka, Shimada et al. 2015), pointing to another potential source for the enhanced IFN- $\gamma$  in these animals. Of note, activation of IELs via



the T cell receptor *in vivo* results in significant reduction of MNV viral titers in the small intestine and MLN of WT B6 mice (Swamy, Abeler-Dorner et al. 2015), suggesting a potential cell type that may mediate the antiviral activity in plgR KO mice.

Collectively, our findings point to a model in which the immunomodulatory functions of SIg aid in norovirus replication. Interaction of noroviruses with SIg complexes could skew the inflammatory viral immune response since uptake of SIgA by mucosal DCs promoting tolerogenic responses and intestinal homeostasis (Corthesy 2007). This might reduce viral clearance and immune memory formation and account for the weak inflammatory response and poor lasting immunity observed in norovirus infections (Newman and Leon 2015). Another potential model of how SIg may promote norovirus infection could come from co-infection of MNV-susceptible APCs when these cells take up several virions via multivalent SIg complexes. Co-infection can increase viral fitness via complementation or recombination (e.g., (Allison, Thompson et al. 1990, Chen, Du et al. 2015, Erickson, Jesudhasan et al. 2017)).

Taken together, our study demonstrates that contrary to previous studies SIg do not protect from MNV infection but that instead the presence of plgR and SIg promotes infection. Thus, these molecules are host factors that can have either anti- or pro-microbial functions depending on the pathogen. In addition, these findings represent another example in which the microbiota modulates enteric virus pathogenesis. Lastly, these data further highlight that MNV as a natural mouse pathogen has optimized its infection under conditions of intestinal homeostasis. When these conditions are perturbed, such as the absence of plgR, SIg or enteric bacteria, virus infection is compromised. In the future, it will be interesting to test whether this holds true for other enteric viral infections.

# **Acknowledgements:**

We are indebted to Dr. Thaddeus Stappenbeck for the generous gift of plgR KO breeders and Dr. Kathryn Eaton and the germ-free mouse core at the University of Michigan. This work was funded in part by NIH R21 AI103961 to C.E. W. and the University of Michigan Host-Microbiome Initiative. H.T. was supported in part by a University of Michigan Rackham Merit fellowship and NIH training grants T32AI007413 and T32DK094775.



## Figure Legends

### Figure 1: Acute norovirus infection is reduced in plgR KO mice

**A-G.** Animals were each infected by o.g. with  $3.8 \times 10^5$  PFU/animal MNV-1-NR in 100  $\mu$ l, and tissues were harvested at 18 hpi in a darkened room using a red photolight. The tissue homogenate was serially diluted and exposed to light for 30 min. Replicated viral titers in the indicated tissue of WT B6 and plgR KO animals were assessed via plaque assay. The limit of detection for each graph was as follows (log PFU/g tissue): **A.** 2.728 **B.** 2.029 **C.** 2.219 **D.** 2.286 **E.** 2.071 **F.** 2.071 **G.** 2.235. Data are from two independent experiments and each symbol is a datapoint from an individual animal. Error bars are standard error of the mean (SEM). Data were analyzed using unpaired Student's T test. \* =  $P < 0.05$ . \*\* =  $P < 0.01$ . ns = not statistically significant

### Figure 2: Natural secretory immunoglobulins do not aid in norovirus access to Peyer's patches

**A.** Transcript levels of M cell-related genes, Spi-B and GP2, from WT B6 and plgR KO Peyer's patches over GAPDH transcript levels are shown as  $2^{-(\Delta\Delta CT)}$  in reference to WT B6.  $\Delta CT$  values were analyzed for statistical significance. **B-C.** Intestinal ileal loop assay in WT B6 and plgR KO. 100  $\mu$ l ( $3.81 \times 10^5$  PFU) MNV-1 was injected into a closed loop and incubated for 25 min. Viral genome copy equivalents were measured by RT-qPCR in Peyer's patches. **B.** MNV-1 bound to the follicle-associated epithelium (FAE binding) and MNV-1 internalized into the Peyer's patch (PP) lamina propria (FAE crossing). **C.** MNV-1 was pre-incubated with secretory IgA (SIgA) or bovine serum albumin (BSA) for 1 hour at 37°C before injecting the complex to the loop. MNV-1 genome equivalents per PP are shown. Data are from two to four independent experiments and each symbol is a datapoint from an individual PP. The data mean is indicated for each group. Data were analyzed using unpaired Student's T test. ns = not statistically significant.

### Figure 3: PlgR KO mice have increased small intestinal APC subsets

**A-D.** Peyer's Patches and small intestinal lamina propria cells were isolated from naive plgR KO and WT B6 animals. Live cells were analyzed via flow cytometry. The gating strategy was as follows: Antigen-presenting cells (APCs) were defined as Singlets/Live/CD45+/I-A/I-E (MHCII)+. APCs were further gated into B cells (CD19+/CD11b-), macrophages (CD19-/CD11b+/CD64+), and dendritic cells (CD19-/CD11b+/CD64-/CD11c+). **A-B.** Percentage of live lamina propria (**A**) and Peyer's patch (**B**) cells. **C-D.** Absolute number of live lamina propria (**C**) and Peyer's patch (**D**) cells. Data shown are from two to three independent experiments and each symbol is a datapoint from an individual animal. The data mean is indicated for each group. Data were analyzed using unpaired Student's T test. \* =  $P < 0.05$ . \*\* =  $P < 0.01$ . \*\*\* =  $P < 0.001$ . \*\*\*\* =  $P < 0.0001$ . ns = not statistically significant.

### Figure 4: IFN- $\gamma$ and iNOS Levels are enhanced in plgR KO mice

**A-E.** Total ileal RNA was isolated from naive plgR KO and WT B6 mice to determine host gene levels in reference to *gapdh*. Data is shown in reference to WT B6 and

displayed as  $2^{-(\Delta\Delta CT)}$ .  $\Delta CT$  values were analyzed for significance. Each symbol is the datapoint from an individual animal. The data mean is indicated for each group.  
 $* = P < 0.05$ .  $** = P < 0.01$   $*** = P < 0.001$ .  $**** = P < 0.0001$ . ns = not statistically significant.

## **Figure 5: IFN- $\gamma$ and iNOS Levels are reduced in germ-free plgR KO mice**

**A-D.** Total ileal RNA was isolated from germ-free plgR KO and germ-free WT B6 animals infected for 18 hours via o.g. with  $3.81 \times 10^5$  PFU/animal MNV-1-NR in 100  $\mu$ l. Host gene levels were normalized to *gapdh*. Data is shown in reference to WT B6 and displayed as  $2^{-(\Delta\Delta CT)}$ .  $\Delta CT$  values were analyzed using unpaired Student's T test. Data are from two independent experiments; each symbol is the datapoint from an individual animal. The data mean is indicated for each group. ns = not statistically significant.

## **Figure 6: Equalizing IFN- $\gamma$ levels equalizes norovirus infection**

**A-G.** Germ-free animals were infected by o.g. with  $3.8 \times 10^5$  PFU/animal MNV-1-NR in 100  $\mu$ l, and tissues were harvested at 18 hpi in a darkened room using a red photolight. The tissue homogenate was serially diluted and exposed to light for 30 min. Replicated viral titers in the indicated tissue of germ-free WT B6 and plgR KO animals were assessed via plaque assay. The limit of detection for each graph was as follows (log PFU/g tissue): **A.** 2.356 **B.** 2.881 **C.** 2.057 **D.** 2.317 **E.** 2.014 **F.** 2.077 **G.** 1.993. Data are from four independent experiments and each symbol is a datapoint from an individual animal. Error bars are standard error of the mean (SEM). Values were analyzed using unpaired Student's T test. ns = not statistically significant.

## **Supplemental Figures**

### **Supplemental Figure 1: Kinetics of MNV-1-Neutral Red infection in C57BL/6 mice**

**A-H.** WT B6 animals were infected by o.g. with  $3.8 \times 10^5$  PFU/animal MNV-1-NR in 100  $\mu$ l and tissues of five mice were harvested at the indicated timepoints in a darkened room using a red photolight. The tissue homogenate was serially diluted, and exposed to light for 30 min. Replicated viral titers in the indicated tissues were assessed via plaque assay. Error bars are standard error of the mean (SEM).

### **Supplemental Figure 2: Characterization of plgR KO animals**

**A-B.** Serum and feces was collected from naïve plgR KO and WT B6 and IgA concentrations were measured via ELISA. **A.** Serum diluted 1:500. **B.** 10% fecal slurries diluted 1:200. Each symbol is a datapoint from an individual animal. Error bars are standard error of the mean (SEM). Data were analyzed using unpaired Student's T test.  $* = P < 0.05$ .  $** = P < 0.01$   $*** = P < 0.001$ .  $**** = P < 0.0001$ . nd = not detected.

### **Supplemental Figure 3: Acute norovirus infection is reduced in plgR KO mice**

**A-G.** Animals were infected o.g. with  $3.81 \times 10^5$  PFU/animal MNV-1-NR, and tissues were harvested at 9 hpi in a darkened room using a red photolight. The tissue homogenate was serially diluted and exposed to light for 30 min. Replicated viral titers in the indicated tissue of WT B6 and plgR KO animals were assessed via plaque assay.

The limit of detection for each graph was as follows (log PFU/g tissue): **A.** 2.104 **B.** 2.26  
**C.** 2.338 **D.** 2.525 **E.** 2.313 **F.** 2.216 **G.** 2.507. Data are from three independent  
experiments and each symbol is a datapoint from an individual animal. Error bars are  
standard error of the mean (SEM). Data were analyzed using unpaired Student's T test.  
\*= P<0.05. \*\*= P<0.01 ns = not statistically significant.

#### **Supplemental Figure 4: Natural secretory immunoglobulins do not aid in MNV access to the Peyer's patch**

**A.** ELISA was performed by coating microtiter plates with 0.1 mg/ml of recombinant murine secretory IgA (SIgA), murine polymeric IgA (pIgA), or murine secretory component (SC) and incubated with bacterially expressed protruding- (P) or shell- (S) domains of the MNV-1 capsid or ELISA coating buffer (B). Protein domains were detected using an MNV-1 capsid antibody followed by a peroxidase-conjugated secondary antibody. Absorbance was read at 405 nm. Six replicates are shown. Error bars represent standard error of the mean (SEM).

**B.** Intestinal ileal loop assay in WT B6 and pIgR KO. 100  $\mu$ l ( $3.81 \times 10^5$  PFU/loop) MNV-1 was injected into the closed loop and incubated for 25 min. Viral genome copy equivalents were measured by RT-qPCR in Peyer's patches. Data are from four independent experiments and each symbol is a datapoint from an individual PP. The data mean is indicated for each group. Data were analyzed using unpaired Student's T test. ns = not statistically significant.

# References

- Allison, R., C. Thompson and P. Ahlquist (1990). "Regeneration of a functional RNA virus genome by recombination between deletion mutants and requirement for cowpea chlorotic mottle virus 3a and coat genes for systemic infection." Proc Natl Acad Sci U S A **87**(5): 1820-1824.
- Baldrige, M. T., T. J. Nice, B. T. McCune, C. C. Yokoyama, A. Kambal, M. Wheadon, M. S. Diamond, Y. Ivanova, M. Artyomov and H. W. Virgin (2015). "Commensal microbes and interferon-lambda determine persistence of enteric murine norovirus infection." Science **347**(6219): 266-269.
- Baldrige, M. T., H. Turula and C. E. Wobus (2016). "Norovirus Regulation by Host and Microbe." Trends Mol Med **22**(12): 1047-1059.
- Bartsch, S. M., B. A. Lopman, S. Ozawa, A. J. Hall and B. Y. Lee (2016). "Global Economic Burden of Norovirus Gastroenteritis." PLoS One **11**(4): e0151219.
- Cerutti, A. (2008). "The regulation of IgA class switching." Nat Rev Immunol **8**(6): 421-434.
- Changotra, H., Y. Jia, T. N. Moore, G. Liu, S. M. Kahan, S. V. Sosnovtsev and S. M. Karst (2009). "Type I and type II interferons inhibit the translation of murine norovirus proteins." J Virol **83**(11): 5683-5692.
- Chen, Y. H., W. Du, M. C. Hagemeijer, P. M. Takvorian, C. Pau, A. Cali, C. A. Brantner, E. S. Stempinski, P. S. Connelly, H. C. Ma, P. Jiang, E. Wimmer, G. Altan-Bonnet and N. Altan-Bonnet (2015). "Phosphatidylserine vesicles enable efficient en bloc transmission of enteroviruses." Cell **160**(4): 619-630.
- Cherdantseva, L. A., O. V. Potapova, T. V. Sharkova, Y. Y. Belyaeva and V. A. Shkurupiy (2014). "Association of Helicobacter pylori and iNOS production by macrophages and lymphocytes in the gastric mucosa in chronic gastritis." J Immunol Res **2014**: 762514.
- Corthesy, B. (2007). "Roundtrip ticket for secretory IgA: role in mucosal homeostasis?" J Immunol **178**(1): 27-32.
- Corthesy, B. (2009). "Secretory immunoglobulin A: well beyond immune exclusion at mucosal surfaces." Immunopharmacol Immunotoxicol **31**(2): 174-179.
- Corthesy, B., Y. Benureau, C. Perrier, C. Fourgeux, N. Perez, H. Greenberg and I. Schwartz-Cornil (2006). "Rotavirus anti-VP6 secretory immunoglobulin A contributes to protection via intracellular neutralization but not via immune exclusion." J Virol **80**(21): 10692-10699.
- Crottet, P., S. Cottet and B. Corthesy (1999). "Expression, purification and biochemical characterization of recombinant murine secretory component: a novel tool in mucosal immunology." Biochem J **341** ( Pt 2): 299-306.
- Crottet, P., M. C. Peitsch, C. Servis and B. Corthesy (1999). "Covalent homodimers of murine secretory component induced by epitope substitution unravel the capacity of the polymeric Ig receptor to dimerize noncovalently in the absence of IgA ligand." J Biol Chem **274**(44): 31445-31455.
- Davids, B. J., J. E. Palm, M. P. Housley, J. R. Smith, Y. S. Andersen, M. G. Martin, B. A. Hendrickson, F. E. Johansen, S. G. Svard, F. D. Gillin and L. Eckmann (2006). "Polymeric immunoglobulin receptor in intestinal immune defense against the lumen-dwelling protozoan parasite Giardia." J Immunol **177**(9): 6281-6290.
- Erickson, A. K., P. R. Jesudhasan, M. J. Mayer, A. Narbad, S. E. Winter and J. K. Pfeiffer (2017). "Bacteria Facilitate Enteric Virus Co-infection of Mammalian Cells and Promote Genetic Recombination." Cell Host Microbe.
- Geem, D., O. Medina-Contreras, W. Kim, C. S. Huang and T. L. Denning (2012). "Isolation and characterization of dendritic cells and macrophages from the mouse intestine." J Vis Exp(63): e4040.
- Gonzalez-Hernandez, M. B., J. Bragazzi Cunha and C. E. Wobus (2012). "Plaque assay for murine norovirus." J Vis Exp(66): e4297.

Gonzalez-Hernandez, M. B., T. Liu, L. P. Blanco, H. Auble, H. C. Payne and C. E. Wobus (2013). "Murine norovirus transcytosis across an in vitro polarized murine intestinal epithelial monolayer is mediated by M-like cells." *J Virol* **87**(23): 12685-12693.

Gonzalez-Hernandez, M. B., T. Liu, H. C. Payne, J. E. Stencel-Baerenwald, M. Ikizler, H. Yagita, T. S. Dermody, I. R. Williams and C. E. Wobus (2014). "Efficient norovirus and reovirus replication in the mouse intestine requires microfold (M) cells." *J Virol* **88**(12): 6934-6943.

Gonzalez-Hernandez, M. B., J. W. Perry and C. E. Wobus (2013). "Neutral Red Assay for Murine Norovirus Replication and Detection in a Mouse." *Bio Protoc* **3**(7).

Grau, K. R., A. N. Roth, S. Zhu, A. Hernandez, N. Colliou, B. B. DiVita, D. T. Philip, C. Riffe, B. Giasson, S. M. Wallet, M. Mohamadzeadeh and S. M. Karst (2017). "The major targets of acute norovirus infection are immune cells in the gut-associated lymphoid tissue." *Nat Microbiol* **2**(12): 1586-1591.

Hall, A. J., B. A. Lopman, D. C. Payne, M. M. Patel, P. A. Gastanaduy, J. Vinje and U. D. Parashar (2013). "Norovirus disease in the United States." *Emerg Infect Dis* **19**(8): 1198-1205.

Hansen, I. S., W. Hoepel, S. A. J. Zaat, D. L. P. Baeten and J. den Dunnen (2017). "Serum IgA Immune Complexes Promote Proinflammatory Cytokine Production by Human Macrophages, Monocytes, and Kupffer Cells through FcαRI-TLR Cross-Talk." *J Immunol* **199**(12): 4124-4131.

Henderson, N. C., A. C. Mackinnon, S. L. Farnworth, F. Poirier, F. P. Russo, J. P. Iredale, C. Haslett, K. J. Simpson and T. Sethi (2006). "Galectin-3 regulates myofibroblast activation and hepatic fibrosis." *Proc Natl Acad Sci U S A* **103**(13): 5060-5065.

Higgins, P. D., L. A. Johnson, K. Sauder, D. Moons, L. Blanco, S. Taube and C. E. Wobus (2011). "Transient or persistent norovirus infection does not alter the pathology of Salmonella typhimurium induced intestinal inflammation and fibrosis in mice." *Comp Immunol Microbiol Infect Dis* **34**(3): 247-257.

Hsu, C. C., C. E. Wobus, E. K. Steffen, L. K. Riley and R. S. Livingston (2005). "Development of a microsphere-based serologic multiplexed fluorescent immunoassay and a reverse transcriptase PCR assay to detect murine norovirus 1 infection in mice." *Clin Diagn Lab Immunol* **12**(10): 1145-1151.

Johansen, F. E., M. Pekna, I. N. Norderhaug, B. Haneberg, M. A. Hietala, P. Krajci, C. Betsholtz and P. Brandtzaeg (1999). "Absence of epithelial immunoglobulin A transport, with increased mucosal leakiness, in polymeric immunoglobulin receptor/secretory component-deficient mice." *J Exp Med* **190**(7): 915-922.

Jones, M. K., K. R. Grau, V. Costantini, A. O. Kolawole, M. de Graaf, P. Freiden, C. L. Graves, M. Koopmans, S. M. Wallet, S. A. Tibbetts, S. Schultz-Cherry, C. E. Wobus, J. Vinje and S. M. Karst (2015). "Human norovirus culture in B cells." *Nat Protoc* **10**(12): 1939-1947.

Jones, M. K., M. Watanabe, S. Zhu, C. L. Graves, L. R. Keyes, K. R. Grau, M. B. Gonzalez-Hernandez, N. M. Iovine, C. E. Wobus, J. Vinje, S. A. Tibbetts, S. M. Wallet and S. M. Karst (2014). "Enteric bacteria promote human and mouse norovirus infection of B cells." *Science* **346**(6210): 755-759.

Kaetzel, C. S. (2005). "The polymeric immunoglobulin receptor: bridging innate and adaptive immune responses at mucosal surfaces." *Immunol Rev* **206**: 83-99.

Kaetzel, C. S. (2014). "Cooperativity among secretory IgA, the polymeric immunoglobulin receptor, and the gut microbiota promotes host-microbial mutualism." *Immunol Lett* **162**(2 Pt A): 10-21.

Karandikar, U. C., S. E. Crawford, N. J. Ajami, K. Murakami, B. Kou, K. Ettayebi, G. A. Papanicolaou, U. Jongwutiwes, M. A. Perales, J. Shia, D. Mercer, M. J. Finegold, J. Vinje, R. L. Atmar and M. K. Estes (2016). "Detection of human norovirus in intestinal biopsies from immunocompromised transplant patients." *J Gen Virol* **97**(9): 2291-2300.



755 Karlsson, M. R., F. E. Johansen, H. Kahu, A. Macpherson and P. Brandtzaeg (2010).  
756 "Hypersensitivity and oral tolerance in the absence of a secretory immune system." Allergy  
757 **65**(5): 561-570.  
758 Karst, S. M. (2016). "The influence of commensal bacteria on infection with enteric viruses." Nat  
759 Rev Microbiol **14**(4): 197-204.  
760 Karst, S. M. and C. E. Wobus (2015). "Viruses in Rodent Colonies: Lessons Learned from  
761 Murine Noroviruses." Annu Rev Virol **2**(1): 525-548.  
762 Karst, S. M. and C. E. Wobus (2015). "A working model of how noroviruses infect the intestine."  
763 PLoS Pathog **11**(2): e1004626.  
764 Karst, S. M., C. E. Wobus, M. Lay, J. Davidson and H. W. Virgin IV (2003). "STAT1-dependent  
765 innate immunity to a Norwalk-like virus." Science **299**(5612): 1575-1578.  
766 Karupiah, G., Q. W. Xie, R. M. Buller, C. Nathan, C. Duarte and J. D. MacMicking (1993).  
767 "Inhibition of viral replication by interferon-gamma-induced nitric oxide synthase." Science  
768 **261**(5127): 1445-1448.  
769 Kato-Nagaoka, N., S. Shimada, Y. Yamakawa, S. Tsujibe, T. Naito, H. Setoyama, Y. Watanabe,  
770 K. Shida, S. Matsumoto and M. Nanno (2015). "Enhanced differentiation of intraepithelial  
771 lymphocytes in the intestine of polymeric immunoglobulin receptor-deficient mice." Immunology  
772 **146**(1): 59-69.  
773 Kernbauer, E., Y. Ding and K. Cadwell (2014). "An enteric virus can replace the beneficial  
774 function of commensal bacteria." Nature **516**(7529): 94-98.  
775 Kim, M., H. Lee, K. O. Chang and G. Ko (2010). "Molecular characterization of murine norovirus  
776 isolates from South Korea." Virus Res **147**(1): 1-6.  
777 Kitajima, M., T. Oka, Y. Tohya, H. Katayama, N. Takeda and K. Katayama (2009).  
778 "Development of a broadly reactive nested reverse transcription-PCR assay to detect murine  
779 noroviruses, and investigation of the prevalence of murine noroviruses in laboratory mice in  
780 Japan." Microbiol Immunol **53**(9): 531-534.  
781 Kolawole, A. O., H. Q. Smith, S. A. Svoboda, M. S. Lewis, M. B. Sherman, G. C. Lynch, B. M.  
782 Pettitt, T. J. Smith and C. E. Wobus (2017). "Norovirus Escape from Broadly Neutralizing  
783 Antibodies Is Limited to Allosteric-Like Mechanisms." mSphere **2**(5).  
784 Lopusna, K., T. Benkoczka, J. Luptak, R. Matuskova, L. Lukacikova, I. Oveckova and I.  
785 Rezuchova (2016). "Murine gammaherpesvirus targets type I IFN receptor but not type III IFN  
786 receptor early in infection." Cytokine **83**: 158-170.  
787 Mabbott, N. A., D. S. Donaldson, H. Ohno, I. R. Williams and A. Mahajan (2013). "Microfold (M)  
788 cells: important immunosurveillance posts in the intestinal epithelium." Mucosal Immunol **6**(4):  
789 666-677.  
790 Maloney, N. S., L. B. Thackray, G. Goel, S. Hwang, E. Duan, P. Vachharajani, R. Xavier and H.  
791 W. Virgin (2012). "Essential cell-autonomous role for interferon (IFN) regulatory factor 1 in IFN-  
792 gamma-mediated inhibition of norovirus replication in macrophages." J Virol **86**(23): 12655-  
793 12664.  
794 Mantis, N. J., M. C. Cheung, K. R. Chintalacharuvu, J. Rey, B. Corthesy and M. R. Neutra  
795 (2002). "Selective adherence of IgA to murine Peyer's patch M cells: evidence for a novel IgA  
796 receptor." J Immunol **169**(4): 1844-1851.  
797 Mantis, N. J., N. Rol and B. Corthesy (2011). "Secretory IgA's complex roles in immunity and  
798 mucosal homeostasis in the gut." Mucosal Immunol **4**(6): 603-611.  
799 Mohanty, S. K., P. Shivakumar, G. Sabla and J. A. Bezerra (2006). "Loss of interleukin-12  
800 modifies the pro-inflammatory response but does not prevent duct obstruction in experimental  
801 biliary atresia." BMC Gastroenterol **6**: 14.  
802 Mowat, A. M. and W. W. Agace (2014). "Regional specialization within the intestinal immune  
803 system." Nat Rev Immunol **14**(10): 667-685.

Muller, B., U. Klemm, A. Mas Marques and E. Schreier (2007). "Genetic diversity and recombination of murine noroviruses in immunocompromised mice." Arch Virol **152**(9): 1709-1719.

Munder, M., M. Mallo, K. Eichmann and M. Modolell (1998). "Murine macrophages secrete interferon gamma upon combined stimulation with interleukin (IL)-12 and IL-18: A novel pathway of autocrine macrophage activation." J Exp Med **187**(12): 2103-2108.

Murthy, A. K., C. N. Dubose, J. A. Banas, J. J. Coalson and B. P. Arulanandam (2006). "Contribution of polymeric immunoglobulin receptor to regulation of intestinal inflammation in dextran sulfate sodium-induced colitis." J Gastroenterol Hepatol **21**(9): 1372-1380.

Newman, K. L. and J. S. Leon (2015). "Norovirus immunology: Of mice and mechanisms." Eur J Immunol **45**(10): 2742-2757.

Otten, M. A., I. Groenveld, J. G. van de Winkel and M. van Egmond (2006). "Inefficient antigen presentation via the IgA Fc receptor (FcalphaRI) on dendritic cells." Immunobiology **211**(6-8): 503-510.

Pabst, O., V. Cerovic and M. Hornef (2016). "Secretory IgA in the Coordination of Establishment and Maintenance of the Microbiota." Trends Immunol **37**(5): 287-296.

Patel, M. M., M. A. Widdowson, R. I. Glass, K. Akazawa, J. Vinje and U. D. Parashar (2008). "Systematic literature review of role of noroviruses in sporadic gastroenteritis." Emerg Infect Dis **14**(8): 1224-1231.

Persichini, T., M. Colasanti, M. Fraziano, V. Colizzi, C. Medana, F. Polticelli, G. Venturini and P. Ascenzi (1999). "Nitric oxide inhibits the HIV-1 reverse transcriptase activity." Biochem Biophys Res Commun **258**(3): 624-627.

Rey, J., N. Garin, F. Spertini and B. Corthesy (2004). "Targeting of secretory IgA to Peyer's patch dendritic and T cells after transport by intestinal M cells." J Immunol **172**(5): 3026-3033.

Richmond, B. W., R. M. Brucker, W. Han, R. H. Du, Y. Zhang, D. S. Cheng, L. Gleaves, R. Abdolrasulnia, D. Polosukhina, P. E. Clark, S. R. Bordenstein, T. S. Blackwell and V. V. Polosukhin (2016). "Airway bacteria drive a progressive COPD-like phenotype in mice with polymeric immunoglobulin receptor deficiency." Nat Commun **7**: 11240.

Sait, L. C., M. Galic, J. D. Price, K. R. Simpfendorfer, D. A. Diavatopoulos, T. K. Uren, P. H. Janssen, O. L. Wijburg and R. A. Strugnell (2007). "Secretory antibodies reduce systemic antibody responses against the gastrointestinal commensal flora." Int Immunol **19**(3): 257-265.

Sakamoto, N., K. Shibuya, Y. Shimizu, K. Yotsumoto, T. Miyabayashi, S. Sakano, T. Tsuji, E. Nakayama, H. Nakauchi and A. Shibuya (2001). "A novel Fc receptor for IgA and IgM is expressed on both hematopoietic and non-hematopoietic tissues." Eur J Immunol **31**(5): 1310-1316.

Samuel, C. E. (2001). "Antiviral actions of interferons." Clin Microbiol Rev **14**(4): 778-809, table of contents.

Saura, M., C. Zaragoza, A. McMillan, R. A. Quick, C. Hohenadl, J. M. Lowenstein and C. J. Lowenstein (1999). "An antiviral mechanism of nitric oxide: inhibition of a viral protease." Immunity **10**(1): 21-28.

Schwartz-Cornil, I., Y. Benureau, H. Greenberg, B. A. Hendrickson and J. Cohen (2002). "Heterologous protection induced by the inner capsid proteins of rotavirus requires transcytosis of mucosal immunoglobulins." J Virol **76**(16): 8110-8117.

Shimada, S., M. Kawaguchi-Miyashita, A. Kushihiro, T. Sato, M. Nanno, T. Sako, Y. Matsuoka, K. Sudo, Y. Tagawa, Y. Iwakura and M. Ohwaki (1999). "Generation of polymeric immunoglobulin receptor-deficient mouse with marked reduction of secretory IgA." J Immunol **163**(10): 5367-5373.

Stoolman, J. S., K. M. Vannella, S. M. Coomes, C. A. Wilke, T. H. Sisson, G. B. Toews and B. B. Moore (2011). "Latent infection by gammaherpesvirus stimulates profibrotic mediator release from multiple cell types." Am J Physiol Lung Cell Mol Physiol **300**(2): L274-285.

Swamy, M., L. Abeler-Dorner, J. Chettle, T. Mahlakoiv, D. Goubau, P. Chakravarty, G. Ramsay, C. Reis e Sousa, P. Staeheli, B. A. Blacklaws, J. L. Heeney and A. C. Hayday (2015). "Intestinal intraepithelial lymphocyte activation promotes innate antiviral resistance." Nat Commun **6**: 7090.

Taube, S., J. W. Perry, E. McGreevy, K. Yetming, C. Perkins, K. Henderson and C. E. Wobus (2012). "Murine noroviruses bind glycolipid and glycoprotein attachment receptors in a strain-dependent manner." J Virol **86**(10): 5584-5593.

Taube, S., J. R. Rubin, U. Katpally, T. J. Smith, A. Kendall, J. A. Stuckey and C. E. Wobus (2010). "High-resolution x-ray structure and functional analysis of the murine norovirus 1 capsid protein protruding domain." J Virol **84**(11): 5695-5705.

Terashima, A., H. Watarai, S. Inoue, E. Sekine, R. Nakagawa, K. Hase, C. Iwamura, H. Nakajima, T. Nakayama and M. Taniguchi (2008). "A novel subset of mouse NKT cells bearing the IL-17 receptor B responds to IL-25 and contributes to airway hyperreactivity." J Exp Med **205**(12): 2727-2733.

Thackray, L. B., C. E. Wobus, K. A. Chachu, B. Liu, E. R. Alegre, K. S. Henderson, S. T. Kelley and H. W. Virgin IV (2007). "Murine noroviruses comprising a single genogroup exhibit biological diversity despite limited sequence divergence." J Virol **81**(19): 10460-10473.

Uren, T. K., F. E. Johansen, O. L. Wijburg, F. Koentgen, P. Brandtzaeg and R. A. Strugnell (2003). "Role of the polymeric Ig receptor in mucosal B cell homeostasis." J Immunol **170**(5): 2531-2539.

Wijburg, O. L., T. K. Uren, K. Simpfendorfer, F. E. Johansen, P. Brandtzaeg and R. A. Strugnell (2006). "Innate secretory antibodies protect against natural Salmonella typhimurium infection." J Exp Med **203**(1): 21-26.

Wobus, C. E., S. M. Karst, L. B. Thackray, K. O. Chang, S. V. Sosnovtsev, G. Belliot, A. Krug, J. M. Mackenzie, K. Y. Green and H. W. Virgin (2004). "Replication of Norovirus in cell culture reveals a tropism for dendritic cells and macrophages." PLoS Biol **2**(12): e432.

Wood, M. B., D. Rios and I. R. Williams (2016). "TNF-alpha augments RANKL-dependent intestinal M cell differentiation in enteroid cultures." Am J Physiol Cell Physiol **311**(3): C498-507.

Yamazaki, K., S. Shimada, N. Kato-Nagaoka, H. Soga, T. Itoh and M. Nanno (2005). "Accumulation of intestinal intraepithelial lymphocytes in association with lack of polymeric immunoglobulin receptor." Eur J Immunol **35**(4): 1211-1219.

# Figure 1

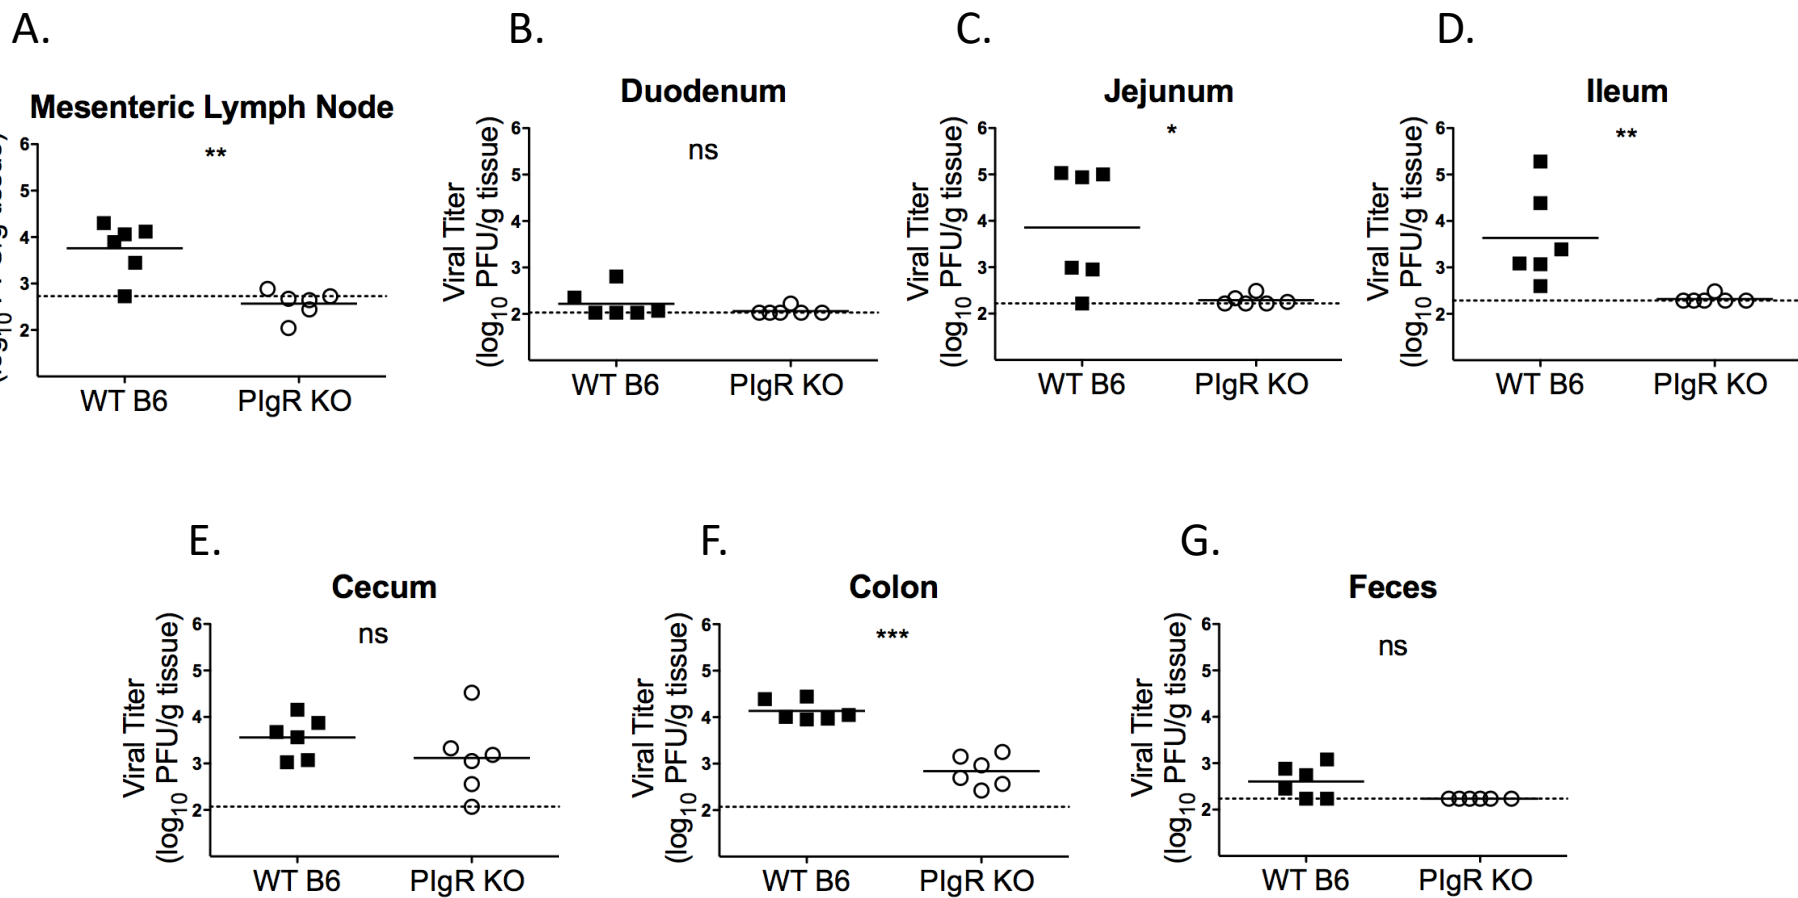

# Figure 2

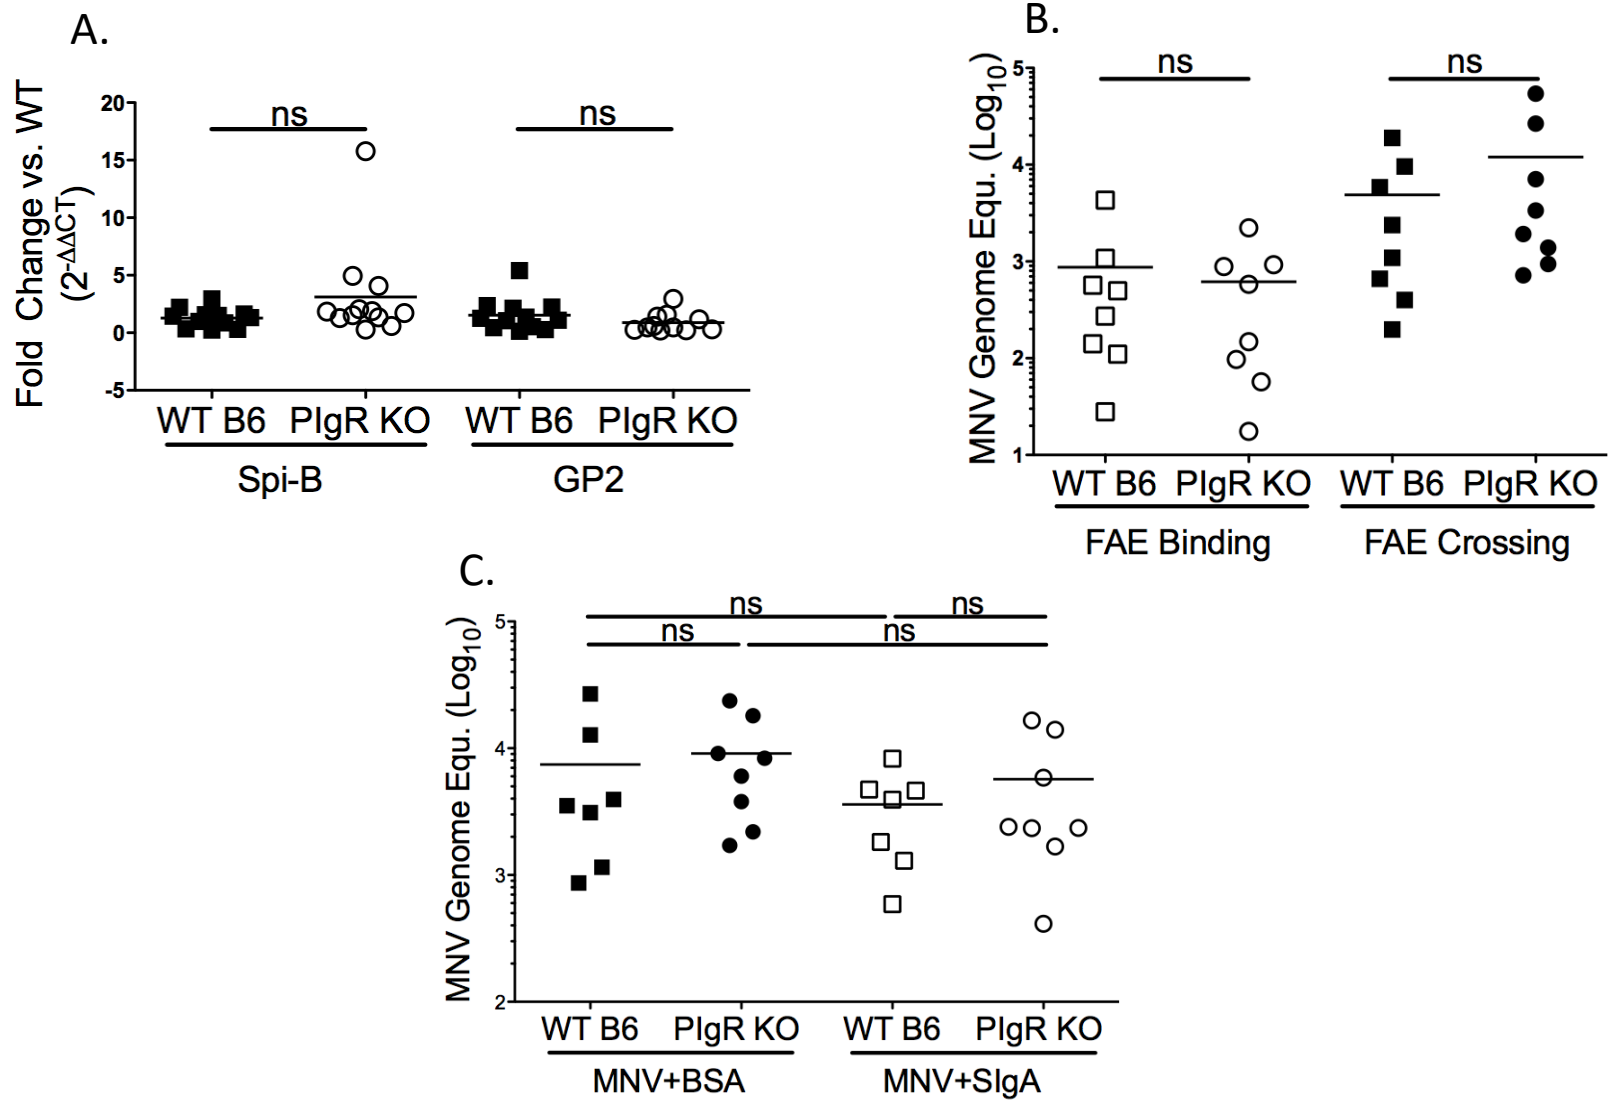



# Figure 3

A.

Lamina Propria

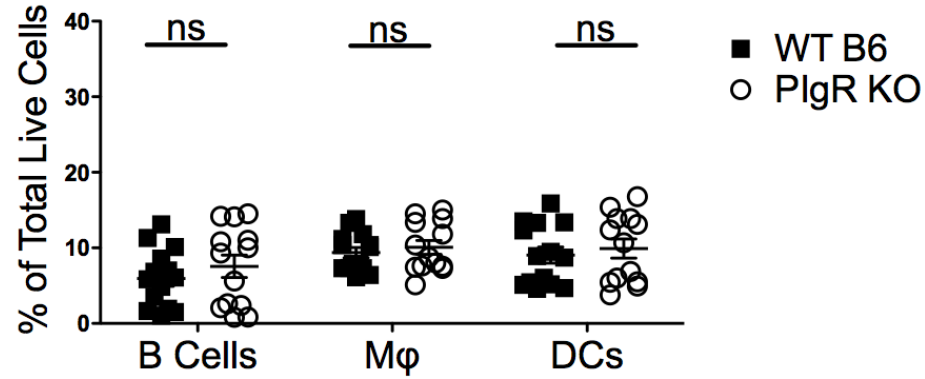

B.

Peyer's Patch

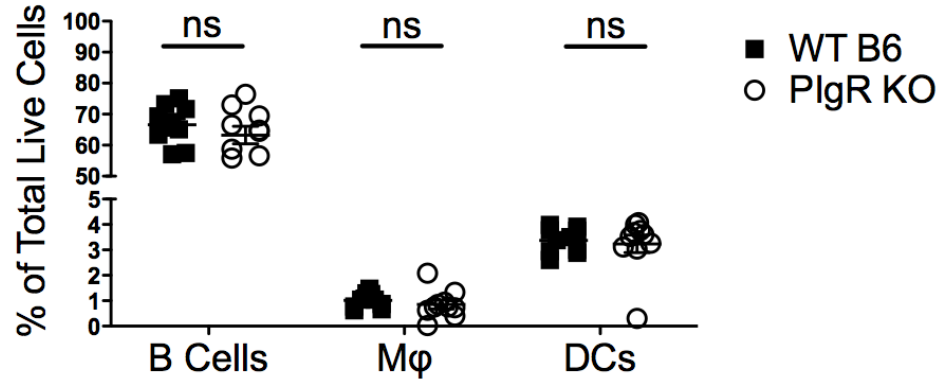

C.

Lamina Propria

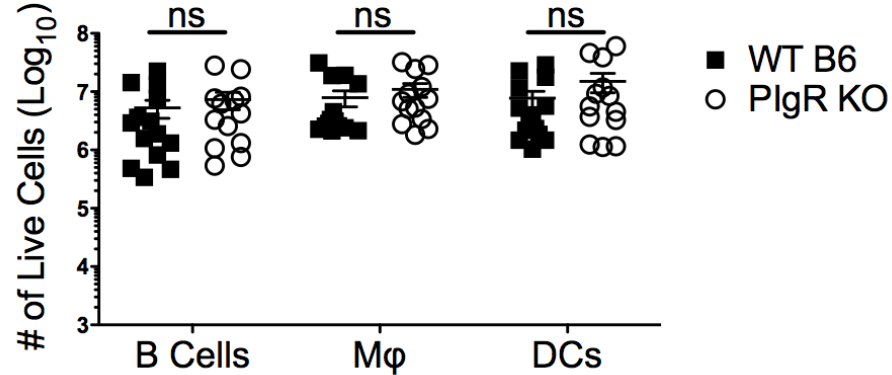

D.

Peyer's Patch

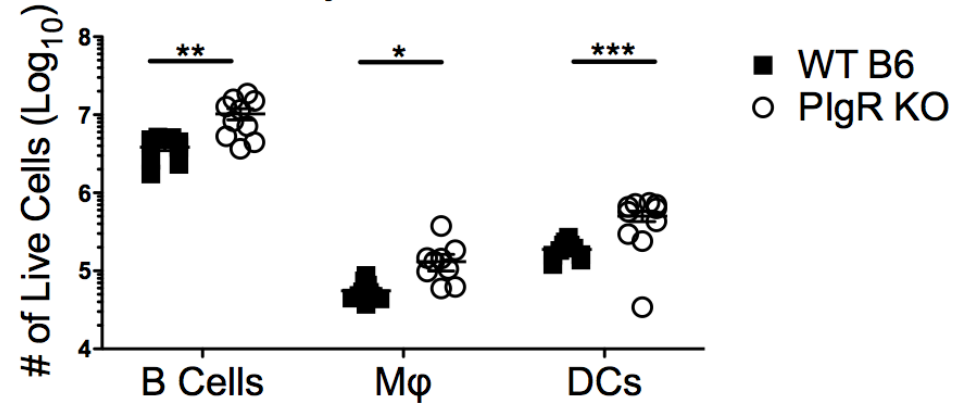

# Figure 4

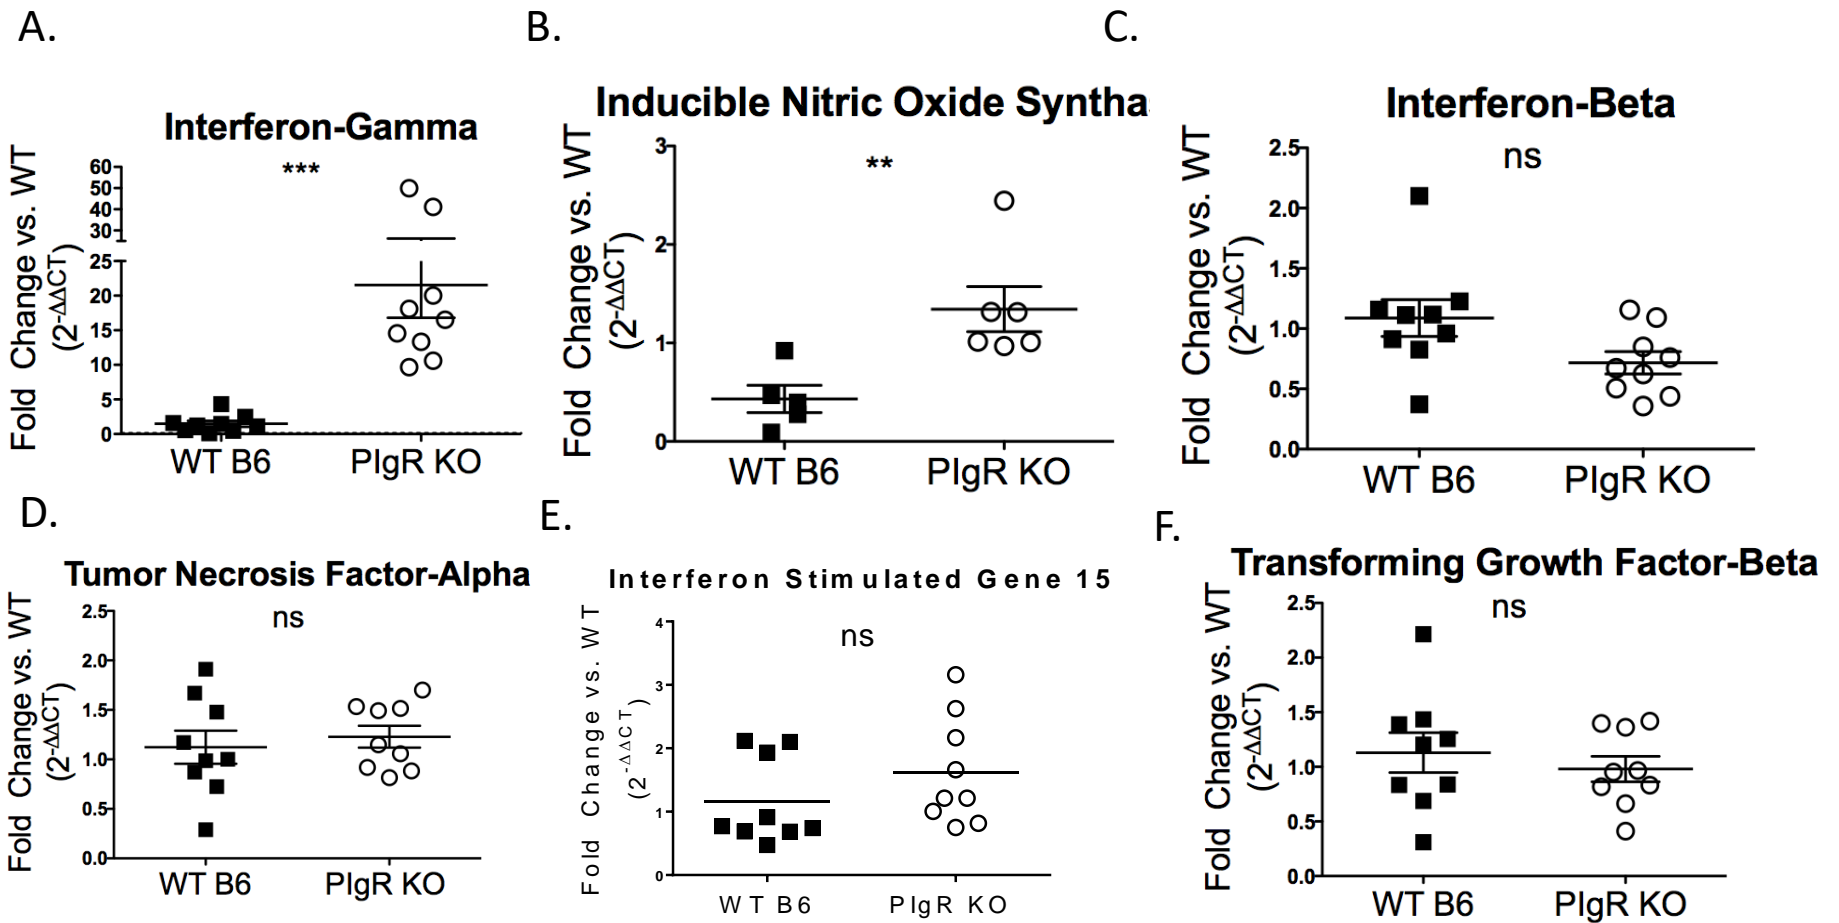

Figure 5

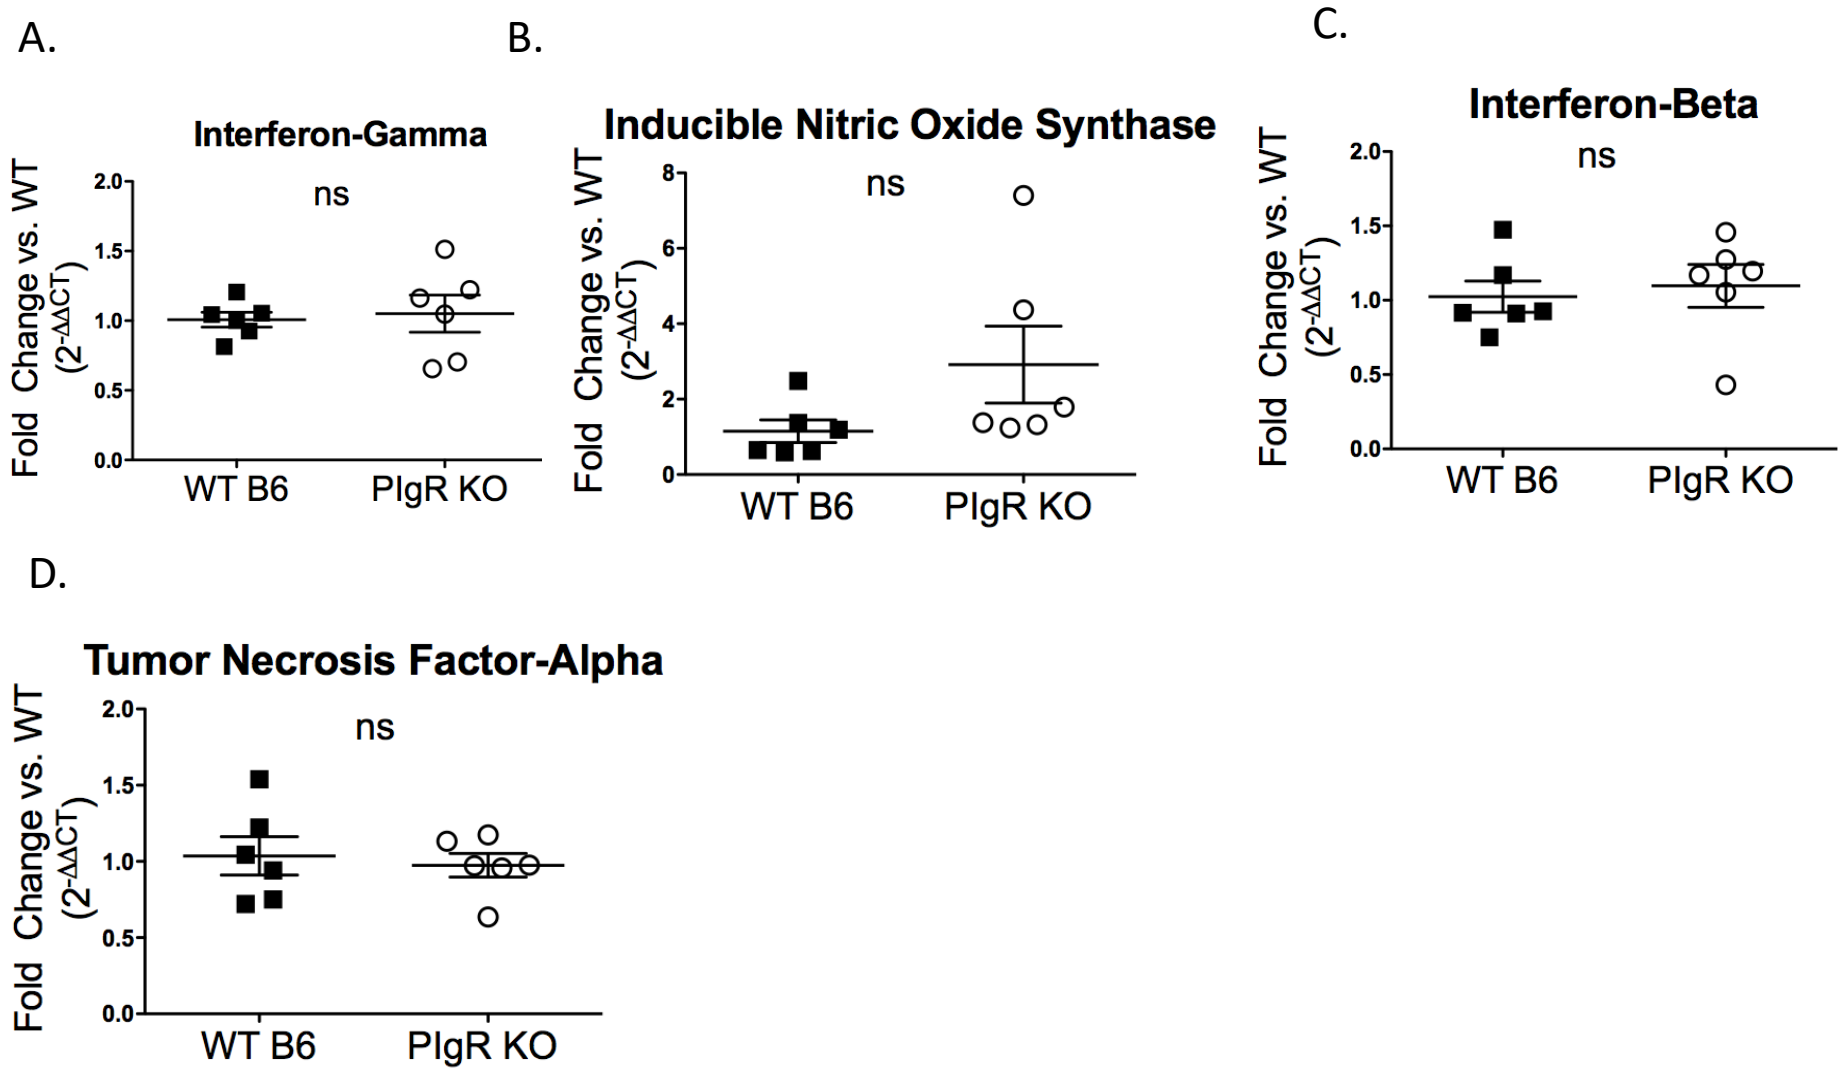

# Figure 6

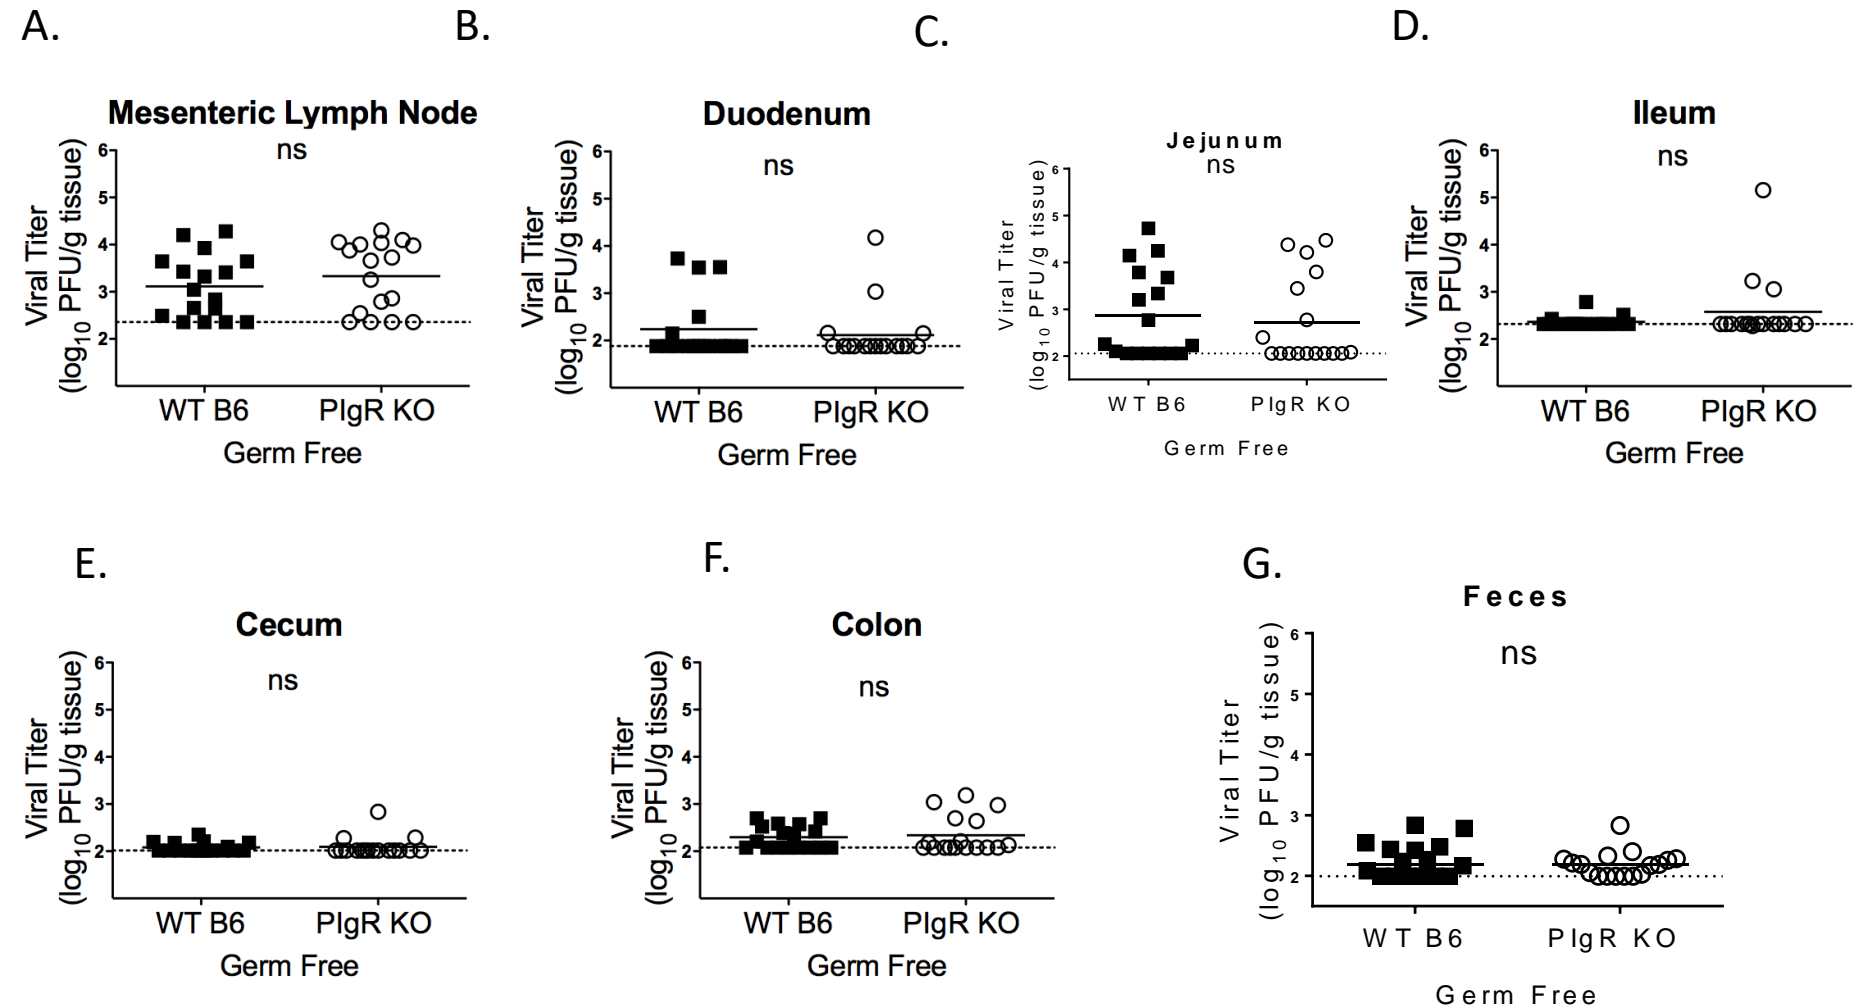

Source: http://biorxiv.org/content/10.1101/253286v1.full.pdf
